# Supplementary material
Source: PubMed Central journal article supplement (PMC2934689)

## Supplementary documents

### Experimental procedures

#### *Materials*

GenomePlex Complete Whole Genome Amplification (WGA) Kit was purchased from Sigma.

#### *Antibodies*

Anti-FLAG M2 affinity gel was purchased from Sigma. Anti-Histone H2B (07-371), histone H3 acetyl K9 and K14 (06-599) antibodies were purchased from Millipore. Histone H3 trimethyl K4 (ab1012), histone H3 mono- (ab9045), di- (ab1220), trimethyl K9 (ab8898) and histone H3 trimethyl K27 (ab6002) antibodies were purchased from Abcam.

#### *ChIP-on-Chip analysis*

hMSC-hTERT-E6/E7 cells ( $1 \times 10^8$  cells), stably-expressing Flag-tagged SF-1, were used for ChIP. Preparation of samples for ChIP is described in the text, except for immunoprecipitation. Immunoprecipitation of ChIP samples with anti-FLAG M2 affinity gel was performed overnight at 4°C with rotation. The whole-genome amplification (WGA) method was used to amplify sufficient amounts of DNA for hybridization to the microarray. Labeling of the ChIP sample and the Input DNA, hybridization, and scanning of the arrays were performed by NimbleGen, Inc (Madison, WI). A microarray experiment was performed with a Whole Genome Tiling Array from NimbleGen (designated number: C4524-19-01; 146,115,199 to 158,821,243 on chr 7 and 1 to 64,734,981 on chr 8).  $\log_2$  ratios were computed for a sample pair and after Tukey bi-weight normalization, visualized by SignalMap software (Roche NimbleGen).

## Figure legends

### Supplementary Fig. 1

ChIP-on-Chip analysis of SF-1 binding sites near the human *StAR* gene on chromosome 8. ChIP experiments were followed by amplification and labeling of the input and the IP DNA using anti Flag-antibody. The labeled input and IP DNAs were then applied to high density oligonucleotide microarray slides, and the data were analyzed and validated as described in the Materials and methods. ChIP-enriched regions were found at the *StAR* promoter (-149/+174) and at 3 kb (-3,521/-2,872) and 15 kb (-15,970/-15,621) upstream sites relative to the *StAR* transcription start site (TSS).

### Supplementary Fig. 2

Transcriptional activities of DNA fragments from the region upstream of the *StAR* gene either with or without 8Br-cAMP treatment. Each DNA fragment was cloned into a luciferase vector, and the reporter constructs, along with a negative control vector pGL4.24, were co-transfected with control vector (pCMV) or an SF-1 expression vector (pCMV/mycSF-1) into HEK293 cells. Luciferase activities were measured 48 h after transfection. Only the -3,494/-3,009 DNA fragment showed strong transcriptional activity after expression of SF-1. 8Br-cAMP treatment further strengthened transcriptional activity of the -3,494/-3,009 fragment. Note that DNA from -15 kb showed no transcriptional activity, in spite of its ability to bind SF-1.

### Supplementary Fig. 3

Luciferase activities of *StAR* upstream region deletion constructs either with or without 8Br-cAMP treatment. Luciferase activities were measured in the presence or absence of 8Br-cAMP. Deletion constructs were co-transfected with pCMV or pCMV/mycSF-1 into HEK293 cells. Cells were or were not treated with 1 mM 8Br-cAMP, 12 h after transfection. Luciferase activities were then measured 48 h after transfection.

### Supplementary Fig. 4

Effects of mutations in the SF-1 sites within the distal control region on luciferase activity either with or without 8Br-cAMP treatment. Mutant constructs were co-transfected with pCMV or pCMV/mycSF-1 into HEK293 cells. Cells were or were not treated with 1 mM 8Br-cAMP, 12 h after transfection. Luciferase activities were then measured 48 h after transfection. The 8Br-cAMP treatment further increased luciferase activities in all constructs.

### Supplementary Fig. 5

(A) Expression of mycLRH-1 and mycSF-1 proteins after adenovirus-mediated introduction of mycLRH-1 or mycSF-1 genes into MSCs (UE7T-13).

(B) Induction of expression of steroidogenesis related genes after adenovirus-mediated introduction of mycLRH-1 or mycSF-1 genes into MSCs.

### Supplementary Fig. 6

Recruitment of modified histone molecules to the promoter of the human *StAR* gene. Acetylated histone H3 (H3Ac), mono- (H3K9(me1)), di- (H3K9(me2)), tri- (H3K9(me3)) methylated lysine 9 residue of histone H3 molecules as well as native H3 molecules were present at the promoter site in LacZ-expressing MSC cells. Differentiation induced by adenovirus-mediated expression of SF-1 resulted in decreased binding of the molecules, whereas binding of SF-1 and RNAP II were increased after SF-1 induced differentiation.

Supplementary Fig. 7

Transcriptional activities of DNA fragments from the upstream region of *StAR* in KGN cells, which express endogenous SF-1. Each DNA fragment was cloned into a luciferase vector and the reporter constructs, along with the negative control vector pGL4.24, were transfected into KGN cells. Luciferase activities were measured 48 h after transfection. Only the -3,494/-3,009 DNA fragment showed strong transcriptional activity in KGN cells. 8Br-cAMP treatment further strengthened transcriptional activity of the -3,494/-3,009 fragment. Note that DNA from -15 kb showed no transcriptional activity, in spite of its ability to bind SF-1.

Supplementary Fig. 8

Luciferase activities of deletion constructs of the *StAR* upstream region in KGN cells either with or without 8Br-cAMP treatment. Luciferase activities were measured in the presence or absence of 8Br-cAMP. Deletion constructs were transfected into KGN cells. Cells were or were not treated with 1 mM 8Br-cAMP, 12 h after transfection. Luciferase activities were then measured 48 h after transfection.

Supplementary Fig. 9

Effects of mutations in the SF-1 sites within the distal control region on luciferase activity in KGN cells either with or without 8Br-cAMP treatment. Mutant constructs were transfected to KGN cells. Cells were or were not treated with 1 mM 8Br-cAMP, 12 h after transfection. Luciferase activities were then measured 48 h after transfection. The 8Br-cAMP treatment further increased luciferase activities in all constructs.

Supplementary Table 1

Nucleotide sequences of oligonucleotides used in plasmid constructions.

Mutated bases are underlined.

| Plasmid constructs                      | Nucleotide sequences (5'-3')                       |
|-----------------------------------------|----------------------------------------------------|
| pGL4.24/hStAR(-15 k) F                  | GAAGCAGCAACAGCAGCATGAATTGCTTA                      |
| pGL4.24/hStAR(-15 k) R                  | TACAGGTATTATTTGGTGTTTTTGTAAGA                      |
| pGL4.24/hStAR(-5,966/-5,521) F          | GAGTGGTGTCACGACCCAAGT                              |
| pGL4.24/hStAR(-5,966/-5,521) R          | CATTTGGTCTTTTGTAATCACCTA                           |
| pGL4.24/hStAR(-3,494/-3,009) F          | TTTTTTGCTCCAAAGCCCTG                               |
| pGL4.24/hStAR(-3,494/-3,009) R          | TATTATGGGACAGGCCA                                  |
| pTA2/hStAR(-5,957/-95) F                | AACCCAGAGAACTGAGTGGTGTCACGACCCAA                   |
| pTA2/hStAR(-5,957/-95) R                | GGTCAAGGATAGAGCGATTGCCTCACACTG                     |
| pBS/hStAR(-2,459/+45) F                 | TCCACAGAAGAGACAAGCAAACAC                           |
| pBS/hStAR(-2,459/+45) R                 | CCTGAGCCCCTCAAGCTTCGCCTCTGAG                       |
| pGL4.11/hStAR(-3,402/+33) F             | CTCCTCCCCCATGGCCT                                  |
| pGL4.11/hStAR(-2,958/+33) F             | GTGCAGGAGAGGCACATGC                                |
| pGL4.11/hStAR(-244/+33) F               | TGTGTGCCTTCATCTAAGCT                               |
| Mut 1<br>(For nucleotide substitutions) | CTCCTCCCCCATGGCCTGCCAT <u>TTT</u> CATCTGGCCTCCTTTC |
| For site-directed mutagenesis           |                                                    |
| Mut 2 F                                 | TTGGCCCTTGCAGAT <u>TT</u> CACCCAGCACCA             |
| Mut 2 R                                 | TGGTGCTGGGTGAA <u>AT</u> CTGCAAGGGCCAA             |
| Mut 3 F                                 | GGCAGCAGCAGGGAA <u>AT</u> TGATCATCATC              |
| Mut 3 R                                 | AGATGATGATCAAT <u>TT</u> CCCTGCTGCTGC              |

Supplementary Table 2

Nucleotide sequences of oligonucleotides used in EMSAs.

Mutated bases are underlined.

| Oligonucleotides         | Nucleotide sequences (5'-3')                           |
|--------------------------|--------------------------------------------------------|
| -113/-86 F               | gAATCGCTCTATCCTTGACCCCTTCCTTTG                         |
| -113/-86 R               | aCAAAGGAAGGGGTCAAGGATAGAGCGATT                         |
| -113/-86 mutant F        | gAATCGCTCTATCCT <u>C</u> GACCCCTTCCTTTG                |
| -113/-86 mutant R        | aCAAAGGAAGGGGT <u>C</u> GAGGATAGAGCGATT                |
| -924/-896 F              | aCTGGCCAGCTGTTTGACCTTGAACAAGTC                         |
| -924/-896 R              | tGACTTGTTCAAGGTCAAACAGCTGGCCAG                         |
| -924/-896 mutant F       | aCTGGCCAGCTGTTTGAA <u>AA</u> TTGAACAAGTC               |
| -924/-896 mutant R       | tGACTTGTTCAAT <u>TT</u> TCAAACAGCTGGCCAG               |
| -3,397/-3,363 F          | tCCCCATGGCCTGCCATGGTCATCTGGCCTCCTTT                    |
| -3,397/-3,363 R          | gAAAGGAGGCCAGATGACCATGGCAGGCCATGGGGG                   |
| -3,397/-3,363 mutant1 F  | tCCCCATGG <u>AA</u> TGCCATGGTCATCTGGCCTCCTTT           |
| -3,397/-3,363 mutant1 R  | gAAAGGAGGCCAGATGACCATGGC <u>AT</u> TCCATGGGGG          |
| -3,397/-3,363 mutant2 F  | tCCCCATGGCCTGCCAT <u>TTT</u> TATCTGGCCTCCTTT           |
| -3,397/-3,363 mutant2 R  | gAAAGGAGGCCAGATGAA <u>AA</u> ATGGCAGGCCATGGGGG         |
| -3,397/-3,363 mutant3 F  | tCCCCATGGCCTGCCATGGTCATCTGG <u>AA</u> TCCTTT           |
| -3,397/-3,363 mutant3 R  | gAAAGGAT <u>T</u> CCAGATGACCATGGCAGGCCATGGGGG          |
| -3,397/-3,363 mutant13 F | tCCCCATGG <u>AA</u> TGCCATGGTCATCTGG <u>AA</u> TCCTTT  |
| -3,397/-3,363 mutant13 R | gAAAGGAT <u>T</u> CCAGATGACCATGGC <u>AT</u> TCCATGGGGG |
| -3,204/-3,187 F          | cTTGCAGAGGTCACCCAGC                                    |
| -3,204/-3,187 R          | tGCTGGGTGACCTCTGCAA                                    |
| -3,204/-3,187 mutant F   | cTTGCAGAT <u>TT</u> TACCCAGC                           |
| -3,204/-3,187 mutant R   | tGCTGGGTGAA <u>AA</u> TCTGCAA                          |
| -3,056/-3,031 F          | gGCAGCAGCAGGGCCTTGATCATCATC                            |
| -3,056/-3,031 R          | aGATGATGATCAAGGCCCTGCTGCTGC                            |

-3,056/-3,031 mutant F gGCAGCAGCAGGGAATTGATCATCATC  
-3,056/-3,031 mutant R aGATGATGATCAATCCCTGCTGCTGC

---

Supplementary Table 3

Nucleotide sequences of oligonucleotides used in real-time RT-PCR and ChIP-qPCR.

| Plasmid constructs | Nucleotide sequences (5'-3') |
|--------------------|------------------------------|
| qRTPCR StAR F      | CCACCCCTAGCACGTGGA           |
| qRTPCR StAR R      | TCCTGGTCACTGTAGAGAGTCTCTTC   |
| qRTPCR GAPDH F     | AATCCCATCACCATCTTCCA         |
| qRTPCR GAPDH R     | TGGACTCCACGACGTACTIONCA      |
| ChIP-15 K F        | GGCTTTCATTGTAACCTTCTGTGGTG   |
| ChIP-15 K R        | TCACAGGCAGTGGCATTATCAG       |
| ChIP-5,966 F       | GAGTGGTGTACGACCCAAGT         |
| ChIP-5,904 R       | CCAGCAGTGAGCCCTCTCTCT        |
| ChIP-4,207 F       | TATGCACAGGATGGATGGCA         |
| ChIP-4,153 R       | ACCCAGCAGTGCTCAGCTCT         |
| ChIP-3,673 F       | CTTTAGAGCCACATAGAGACATTCAGG  |
| ChIP-3,619 R       | CCTCCATTCATTCAACAGTCCTTT     |
| ChIP-3,495 F       | TTTTTTGCTCCAAAGCCCTG         |
| ChIP-3,437 R       | CATGCTGGAGAGGAAGGCC          |
| ChIP-3,237 F       | GCCTGGAAAGGATGAGGGA          |
| ChIP-3,186 R       | TGCTGGGTGACCTCTGCAA          |
| ChIP-3,099 F       | CACCTCCACCCCTTTCAGAA         |
| ChIP-3,032 R       | ATGATGATCAAGGCCCTGCT         |
| ChIP-2,459 F       | TCCACAGAAGAGACAAGCAAACAC     |
| ChIP-2,411 R       | TGGTCCTGATTTGTTGAATGGTT      |
| ChIP-1,987 F       | CCCAATATTCTTGCCCAGTGA        |
| ChIP-1,929 R       | CCCTTTACAGTGACCTTGAGGC       |
| ChIP-902 F         | ACAAGTCAGTTCCACTCTGTGGAC     |
| ChIP-851 R         | TGCTCTTCTTCTGGGTGAGGAC       |

|              |                        |
|--------------|------------------------|
| ChIP-118 F   | GAGGCAATCGCTCTATCCTTGA |
| ChIP-68 R    | CGCCATCACTCACTGTGCA    |
| ChIP+263 F   | GGCCACCCAATTCTGATCC    |
| ChIP+313 R   | TGCCCAGGTTACCCAGTAA    |
| ChIP+6,691 F | AGCCTGCTGTTCCCAACTGT   |
| ChIP+6,751 R | AGGGATTCTCCTGATGAGCGT  |

---



## Supplementary Table 4

Nucleotide sequences of oligonucleotides used in 3C.

---

| <u>Plasmid constructs</u> | <u>Nucleotide sequences (5'-3')</u> |
|---------------------------|-------------------------------------|
| 3C Common Primer          | GGTCAAGGATAGAGCGATTGCCTCACACTG      |
| 3C -3 k primer            | AGGCTCTATCCTCCGTCTCCCACACCACCT      |
| 3C -8 k primer            | AGATGGCAGCCAGGCATATGCTAAGATGCA      |
| 3C -12 k primer           | GTAAGTATGTATCCTATAGTAGTGTTCAGGCA    |
| Loading Control Primer F  | GCCTGGAAAGGATGAGGGA                 |
| Loading Control Primer R  | GGCCATGCAGATGATGATCA                |

---

Supplementary Fig. 1

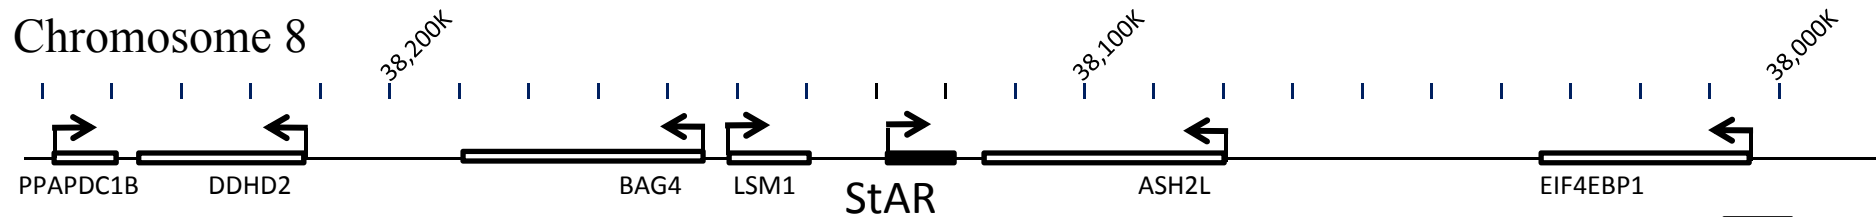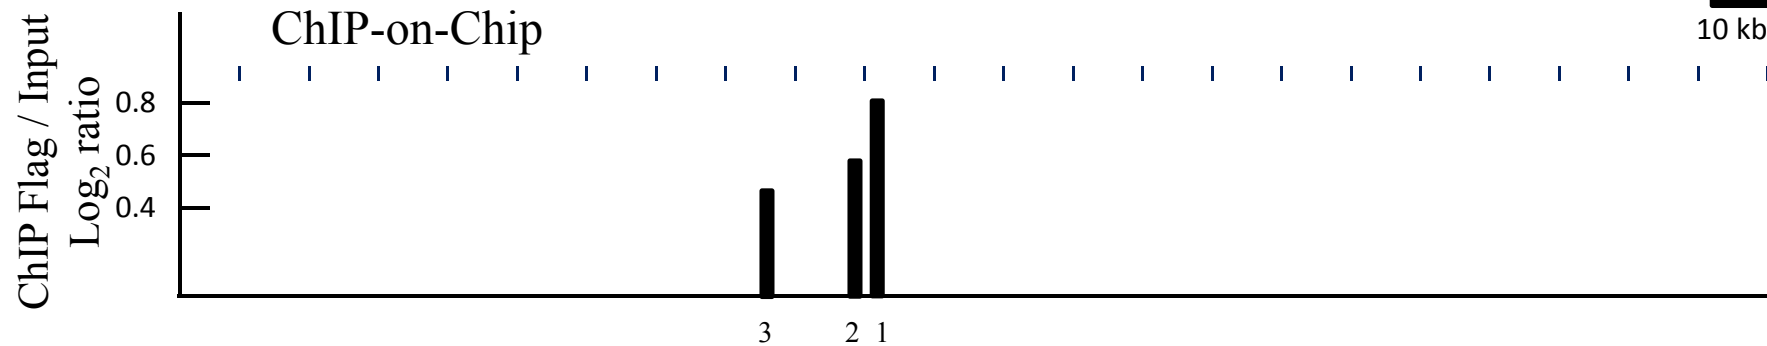

1, -149/+174  
2, -3,521/-2,872  
3, -15,970/-15,621 (base)

Supplementary Fig. 2

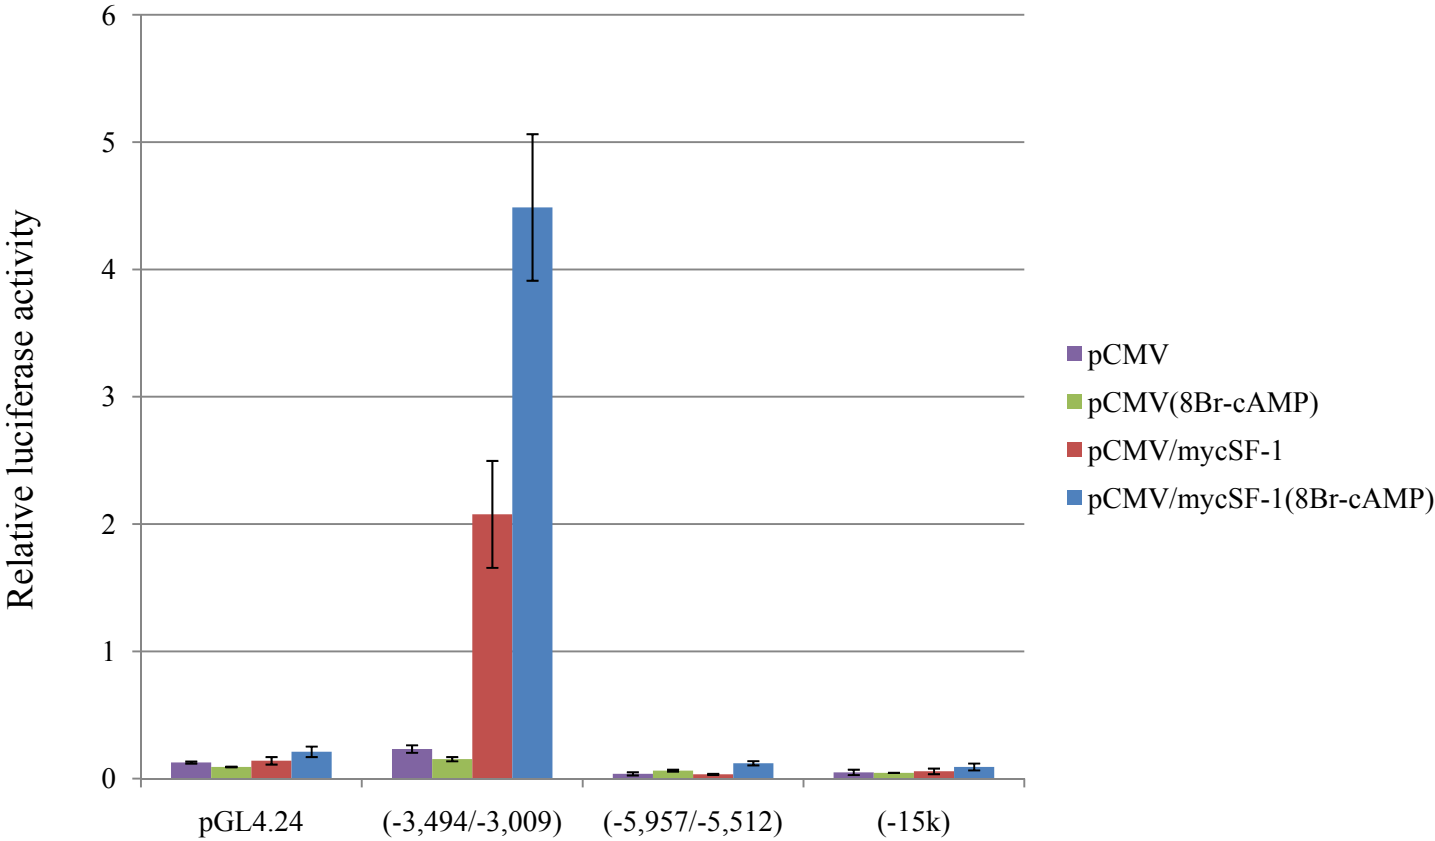

Supplementary Fig. 3

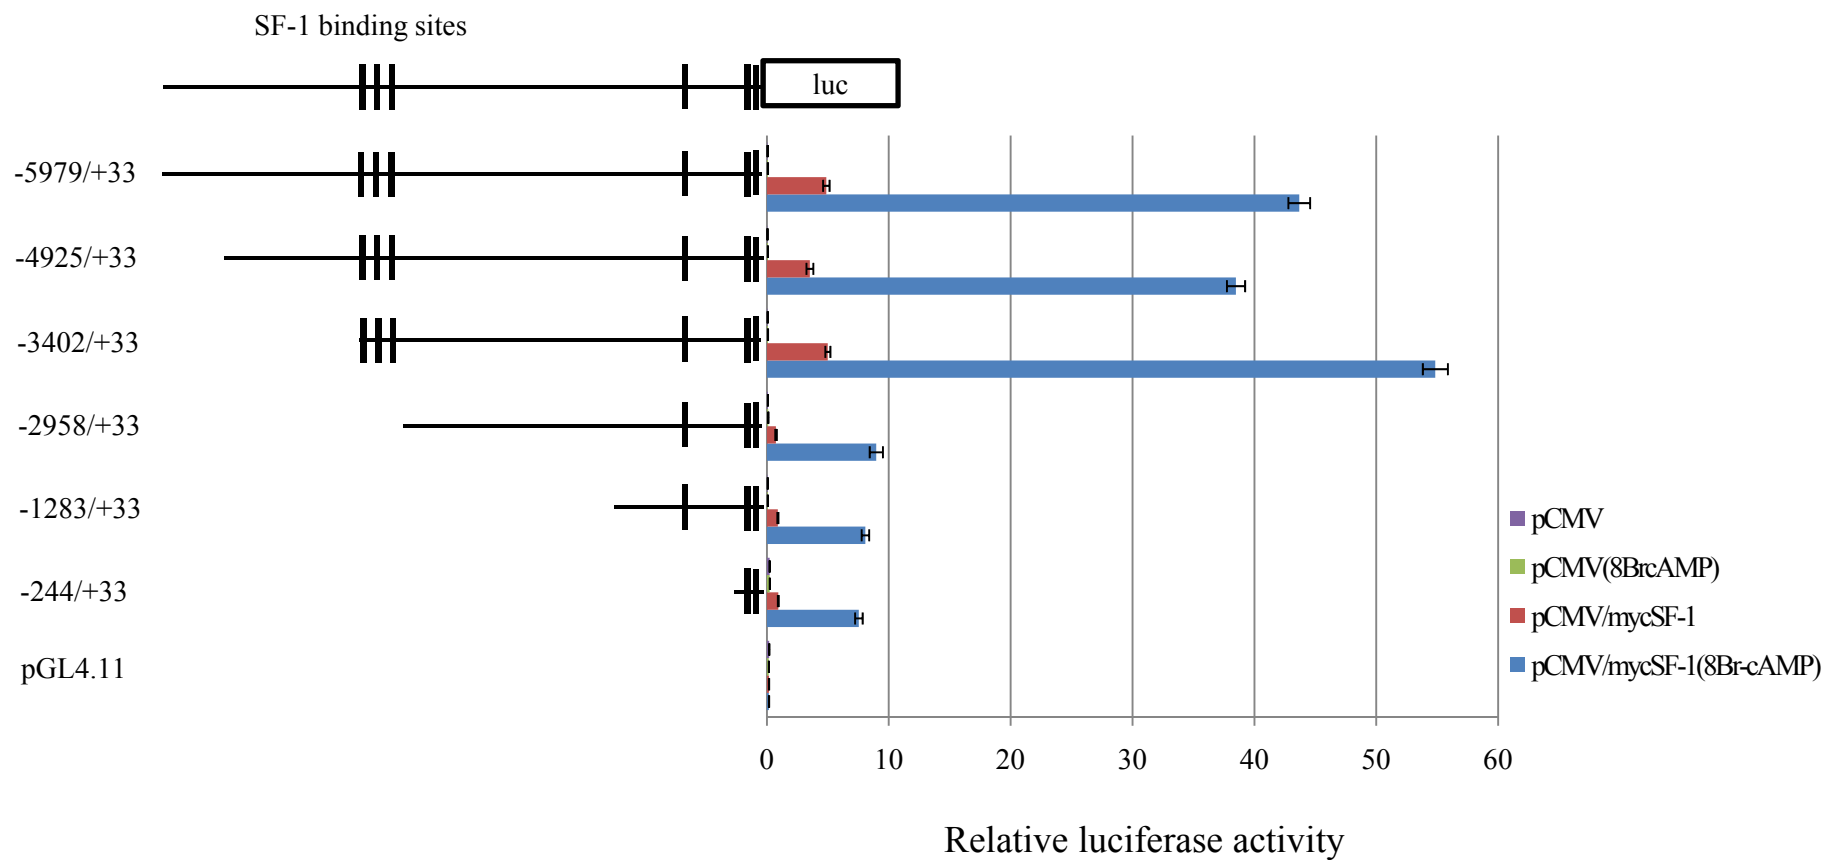

Supplementary Fig. 4

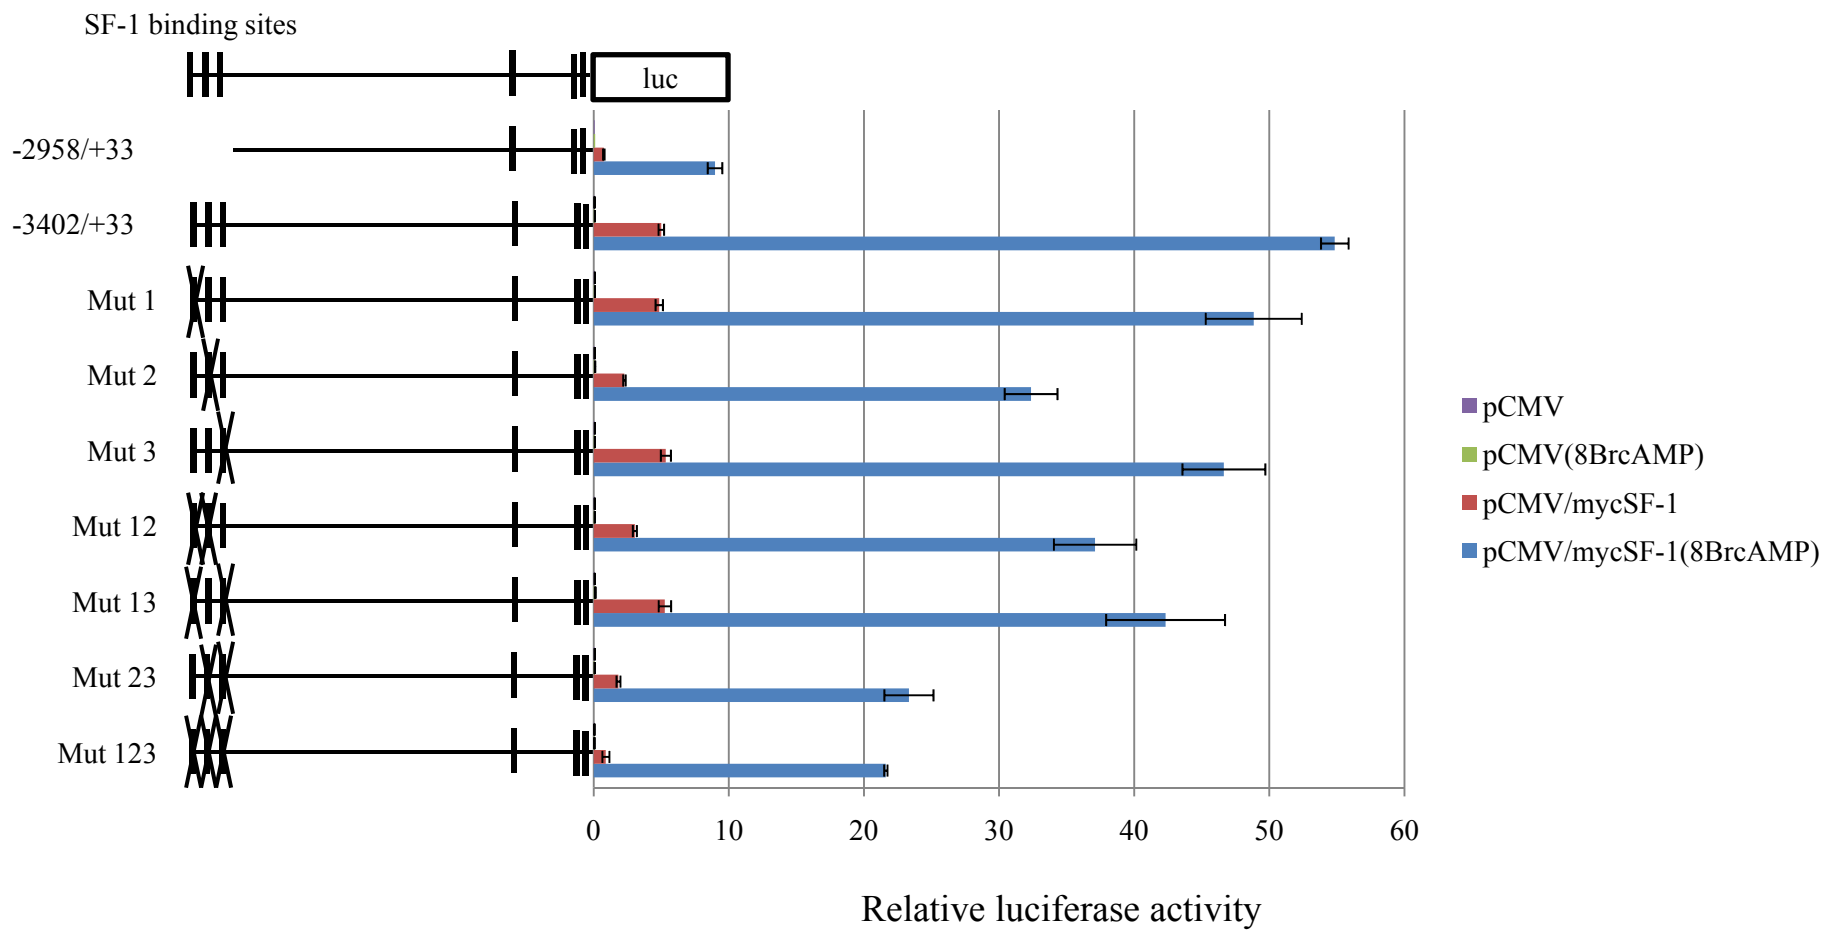

Supplementary Fig. 5

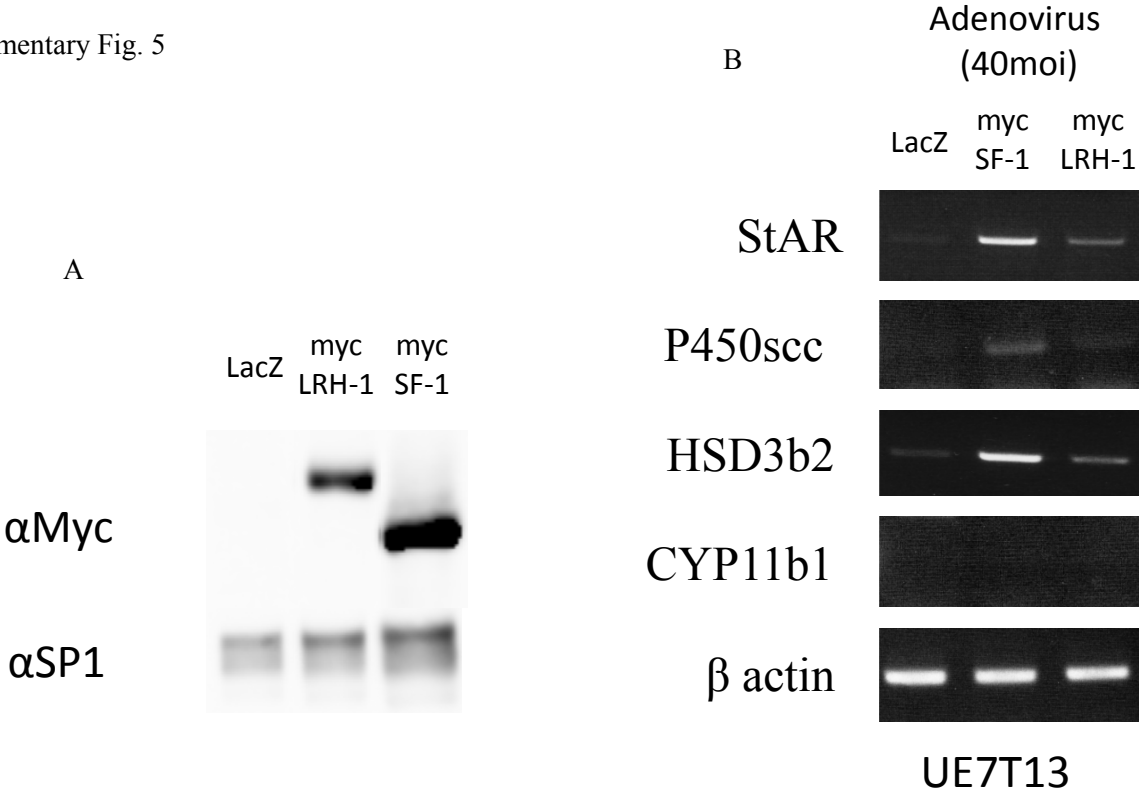

Supplementary Fig. 6

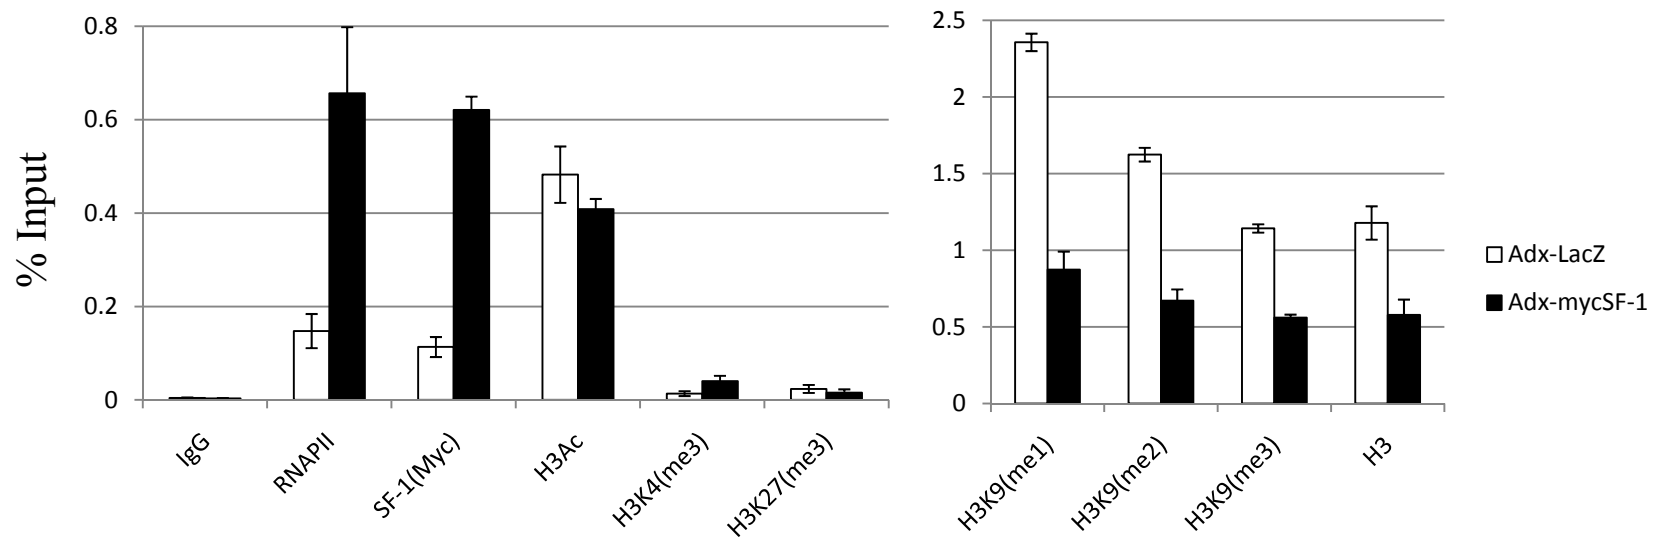

Supplementary Fig. 7

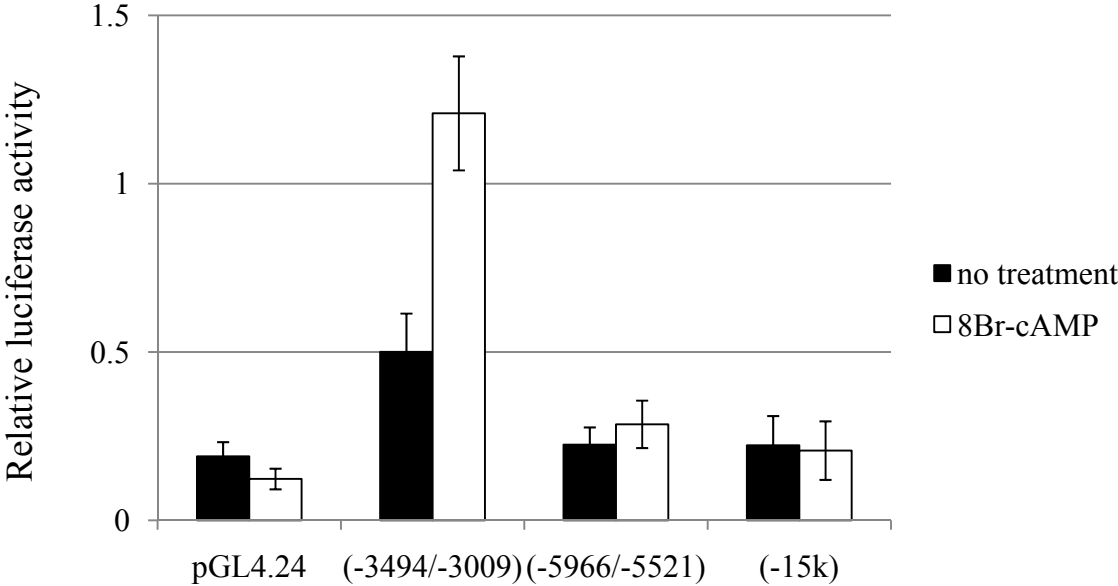



Supplementary Fig. 8

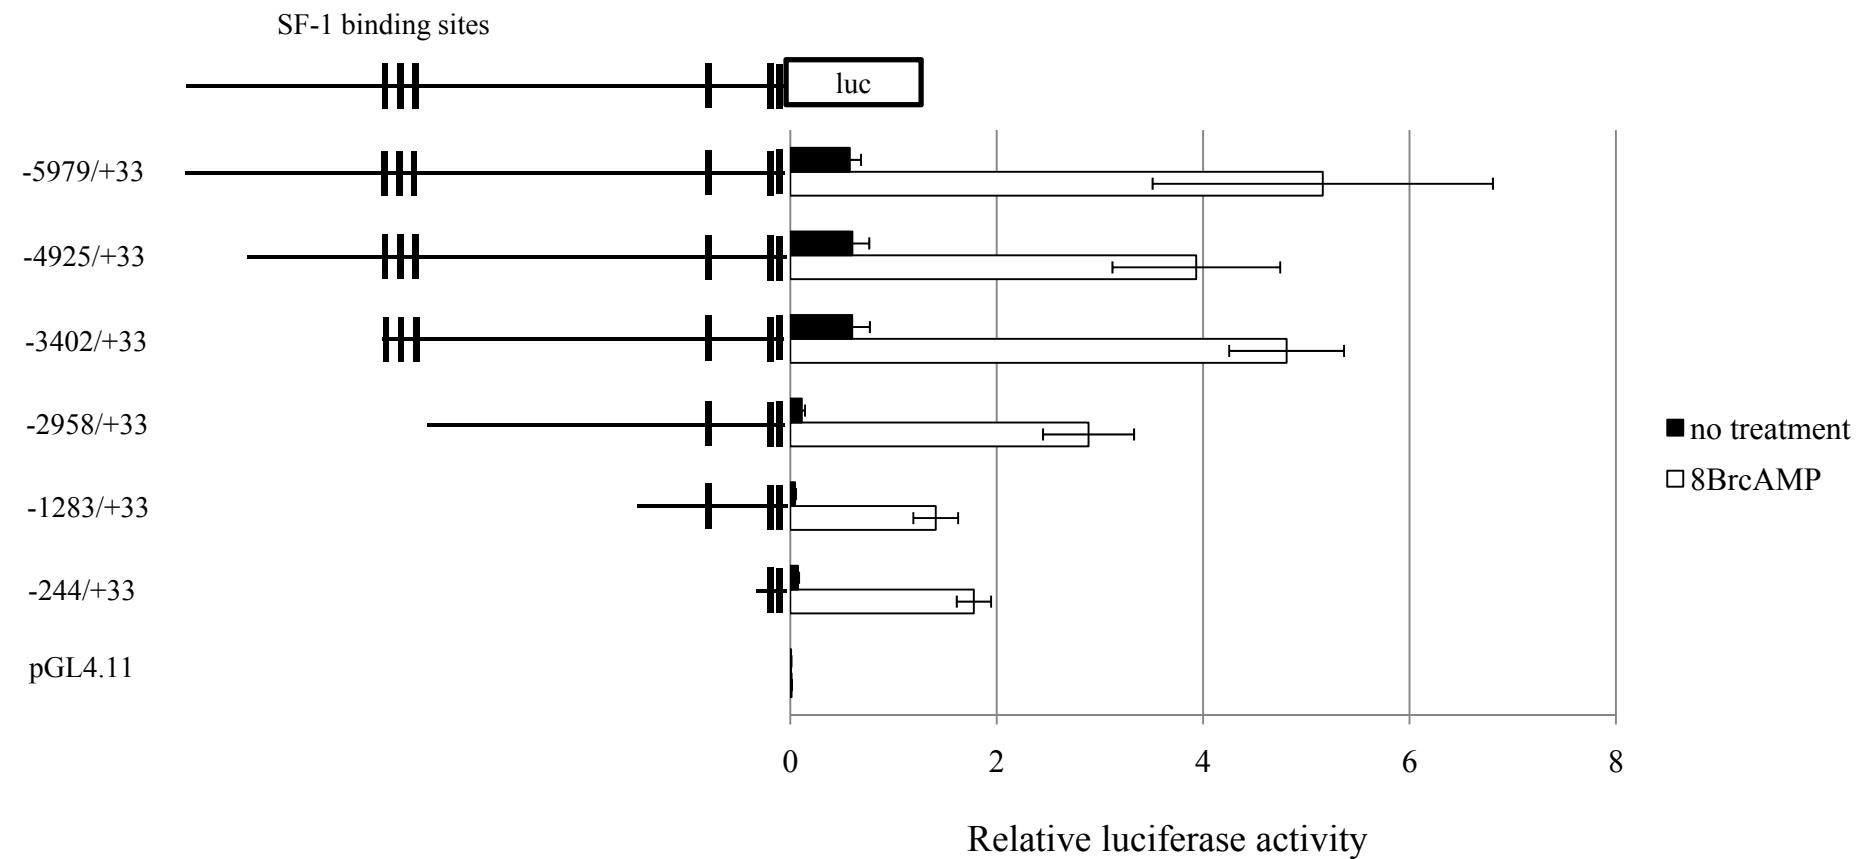

Supplementary Fig. 9

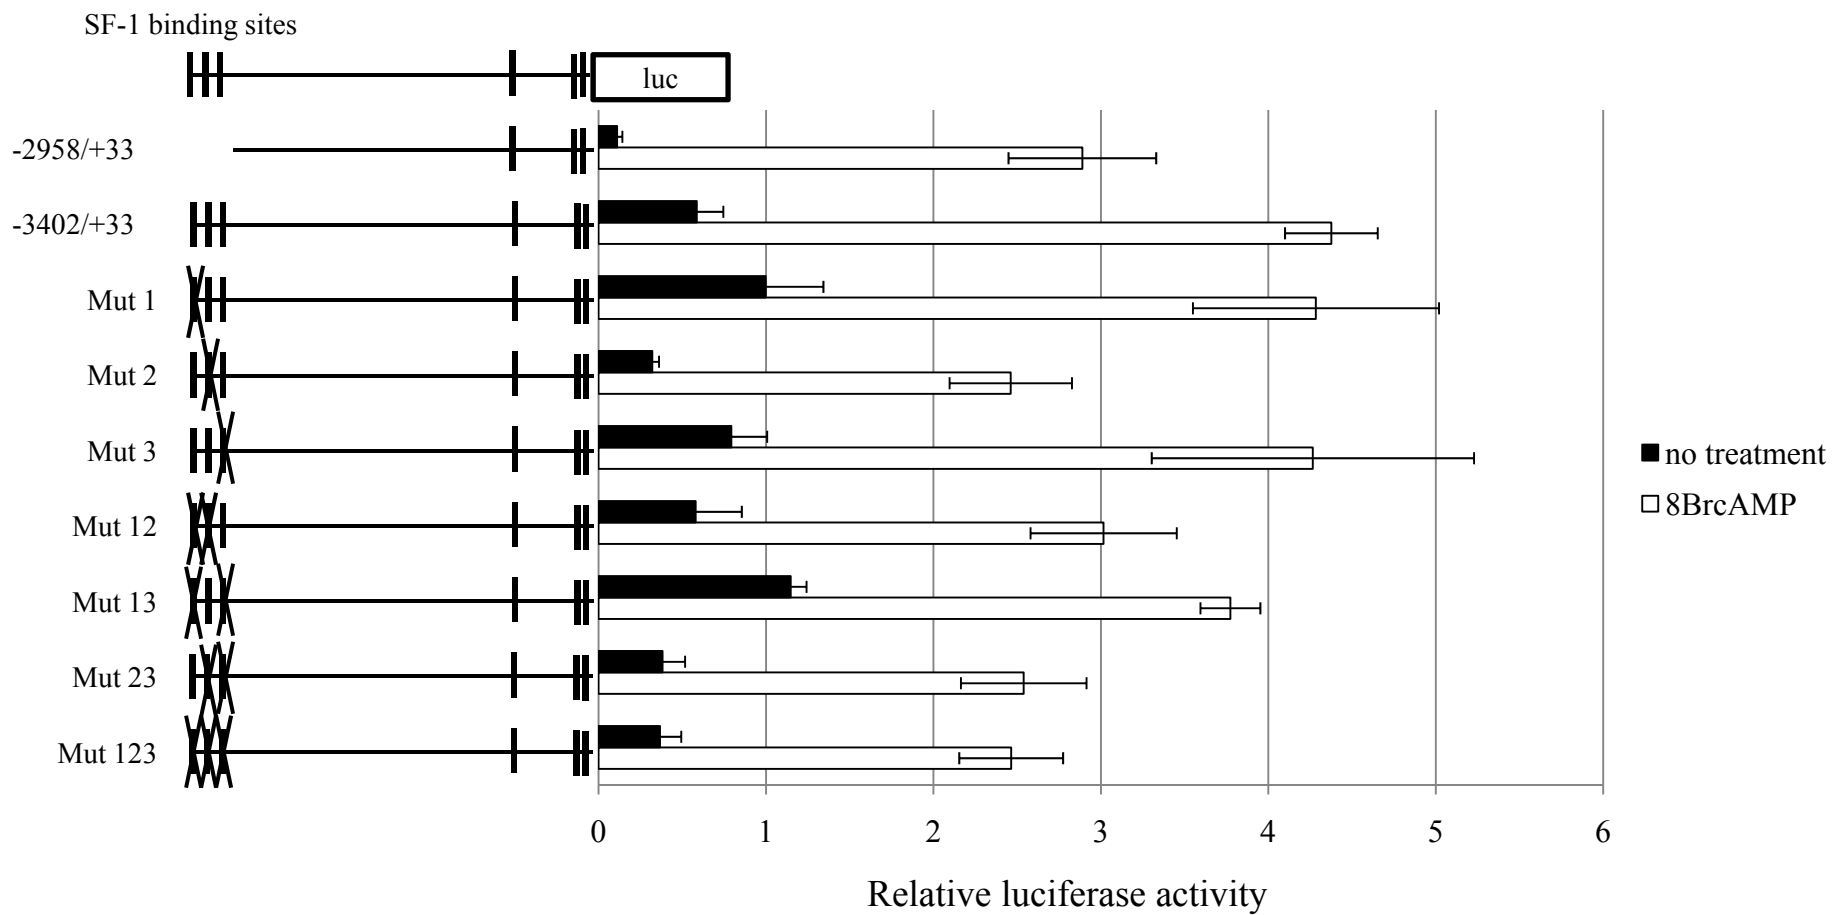

Supplement: supp_M110.129510_jbc.M110.129510-1.pdf [file supp_M110.129510_jbc.M110.129510-1.pdf]
